# Supplementary material for: Environmental Factors Shaping the Community Structure of Ammonia-Oxidizing Bacteria and Archaea in Sugarcane Field Soil
Source: PubMed Central journal article supplement (PMC4356460; doi:10.1264/jsme2.me14137), 2014-12-27
Supplement: 30_21_s1.pdf [file 30_21_s1.pdf]

Table S1 Soil properties, potential nitrification rate (PNR) and fertilization<sup>a</sup>

| Soil sample | Water <sup>b</sup><br>(mg g <sup>-1</sup> ) | pH   | TN<br>(mg g <sup>-1</sup> ) | TC<br>(mg g <sup>-1</sup> ) | NH <sub>4</sub> <sup>+</sup> -N<br>(μg g soil <sup>-1</sup> ) | NO <sub>3</sub> <sup>-</sup> -N<br>(μg g soil <sup>-1</sup> ) | Available-P<br>(μg g soil <sup>-1</sup> ) | PNR <sup>c</sup> | Fertilizer <sup>d</sup><br>kgN ha <sup>-1</sup> year <sup>-1</sup> |
|-------------|---------------------------------------------|------|-----------------------------|-----------------------------|---------------------------------------------------------------|---------------------------------------------------------------|-------------------------------------------|------------------|--------------------------------------------------------------------|
| A1          | 20.5                                        | 4.79 | 0.18                        | 1.32                        | 127.1                                                         | 86.8                                                          | 99.6                                      | 10.40            | 208 <sup>e</sup>                                                   |
| A2          | 23.1                                        | 5.40 | 0.20                        | 1.40                        | 29.8                                                          | 81.4                                                          | 91.4                                      | 11.66            | 180 <sup>e</sup>                                                   |
| B2          | 20.3                                        | 4.33 | 0.21                        | 1.42                        | 296.8                                                         | 35.4                                                          | 89.8                                      | 3.54             | 256 <sup>e</sup>                                                   |
| B7          | 26.2                                        | 4.19 | 0.22                        | 1.75                        | 9.8                                                           | 266.2                                                         | 81.1                                      | 11.12            | 256 <sup>e</sup>                                                   |
| C1          | 19.1                                        | 6.58 | 0.16                        | 1.29                        | 5.0                                                           | 0.2                                                           | 63.3                                      | 9.74             | 0 <sup>f</sup>                                                     |
| C4          | 22.1                                        | 5.23 | 0.17                        | 1.31                        | 15.8                                                          | 2.1                                                           | 60.6                                      | 4.32             | 192 <sup>e</sup>                                                   |
| D1          | 25.5                                        | 4.09 | 0.19                        | 1.42                        | 13.2                                                          | 280.2                                                         | 88.4                                      | 7.99             | 288 <sup>e</sup>                                                   |
| D2          | 23.5                                        | 5.44 | 0.16                        | 1.28                        | 28.6                                                          | 84.4                                                          | 83.7                                      | 12.42            | 216 <sup>e</sup>                                                   |
| D3          | 26.6                                        | 4.56 | 0.22                        | 2.04                        | 6.4                                                           | 43.7                                                          | 79.8                                      | 8.73             | 192 <sup>g</sup>                                                   |
| E1          | 22.1                                        | 4.58 | 0.16                        | 1.27                        | 13.8                                                          | 19.2                                                          | 110.6                                     | 5.40             | 158 <sup>g</sup>                                                   |
| E2          | 21.3                                        | 4.58 | 0.17                        | 1.15                        | 43.4                                                          | 55.8                                                          | 112.6                                     | 5.20             | 216 <sup>e</sup>                                                   |
| E6          | 14.7                                        | 6.32 | 0.20                        | 1.73                        | 32.9                                                          | 6.4                                                           | 63.0                                      | 4.72             | 256 <sup>e</sup>                                                   |
| E7          | 26.7                                        | 7.79 | 0.22                        | 3.71                        | 3.3                                                           | 41.5                                                          | 107.8                                     | 83.92            | 102 <sup>h</sup>                                                   |

<sup>a</sup> All values barring those of PNR and fertilizer were excerpted from a report by Tago *et al.* (doi:10.1264/jsme2.ME14124); <sup>b</sup>water content; <sup>c</sup>potential nitrification rate (nmole nitrite production/hr/g dry soil); <sup>d</sup>based on interviews with farmers; <sup>e</sup>received ammonium sulfate; <sup>f</sup>deserted cultivated land; <sup>g</sup>received slow-release nitrogen fertilizer; <sup>h</sup>received urea and poultry manure.

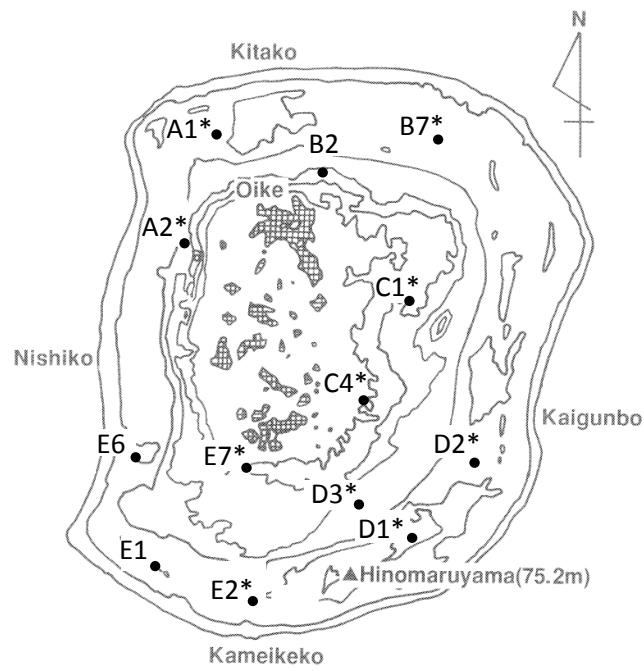

Fig. S1 Map of sampling fields. Field numbers are indicated. The sampling fields used for pyrosequencing analysis are represented by asterisks. A contour map is provided by the Geospatial Information Authority of Japan.

Table S2 Number of sequence reads of AOB and AOA *amoA* genes.

| Soil sample | AOB                  |                          | AOA                  |                          |
|-------------|----------------------|--------------------------|----------------------|--------------------------|
|             | Sequence reads/field | Sequence reads/subsample | Sequence reads/field | Sequence reads/subsample |
| A1          | 5,375                | 2,818                    | 11,254               | 2,706                    |
|             |                      | 1,753                    |                      | 4,765                    |
|             |                      | 804                      |                      | 3,783                    |
| A2          | 11,158               | 3,373                    | 14,716               | 3,828                    |
|             |                      | 4,160                    |                      | 6,654                    |
|             |                      | 3,625                    |                      | 4,234                    |
| B7          | 8,695                | 2,814                    | 15,703               | 5,848                    |
|             |                      | 3,080                    |                      | 4,898                    |
|             |                      | 2,801                    |                      | 4,957                    |
| C1          | 7,823                | 2,376                    | 17,212               | 3,733                    |
|             |                      | 2,314                    |                      | 6,501                    |
|             |                      | 3,133                    |                      | 6,978                    |
| D1          | 5,593                | 1,815                    | 10,746               | 3,755                    |
|             |                      | 1,962                    |                      | 4,269                    |
|             |                      | 1,816                    |                      | 2,722                    |
| D2          | 7,168                | 2,805                    | 11,230               | 4,123                    |
|             |                      | 1,572                    |                      | 4,480                    |
|             |                      | 2,791                    |                      | 2,627                    |
| E2          | 6,013                | 2,060                    | 8,609                | 2,713                    |
|             |                      | 1,301                    |                      | 3,493                    |
|             |                      | 2,652                    |                      | 2,403                    |
| E7          | 9,271                | 2,892                    | 26,022               | 11,093                   |
|             |                      | 3,290                    |                      | 10,207                   |
|             |                      | 3,089                    |                      | 4,722                    |
|             | 61,096               |                          | 115,492              |                          |

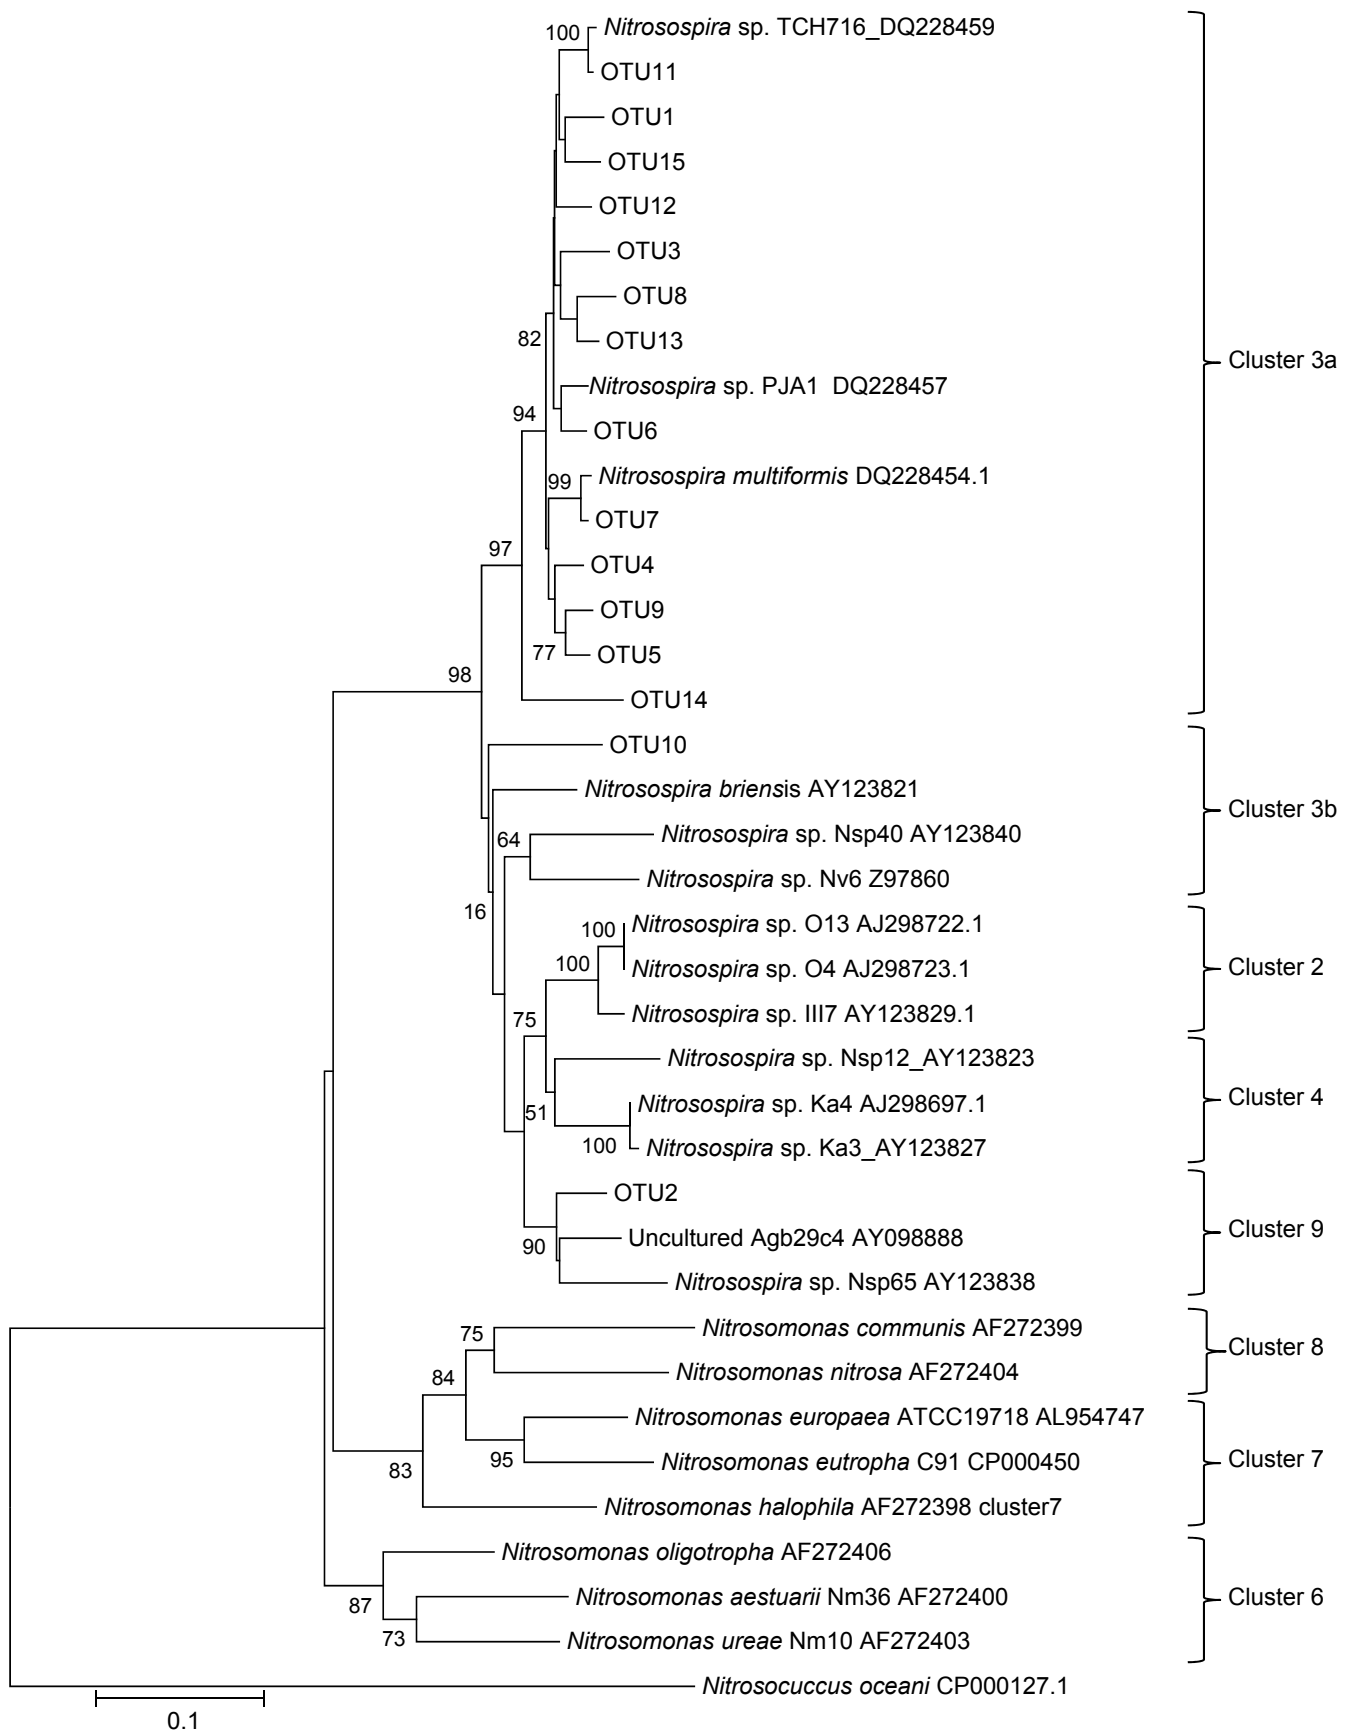

Fig. S2 Phylogenetic tree of AOB *amoA* OTUs. Accession numbers of reference sequences in the NCBI database are indicated. The *amoA* gene sequence of *Nitrosococcus oceani* was used as an outgroup. Branch nodes with >50% supporting bootstrap values (1000 replicates) are shown.

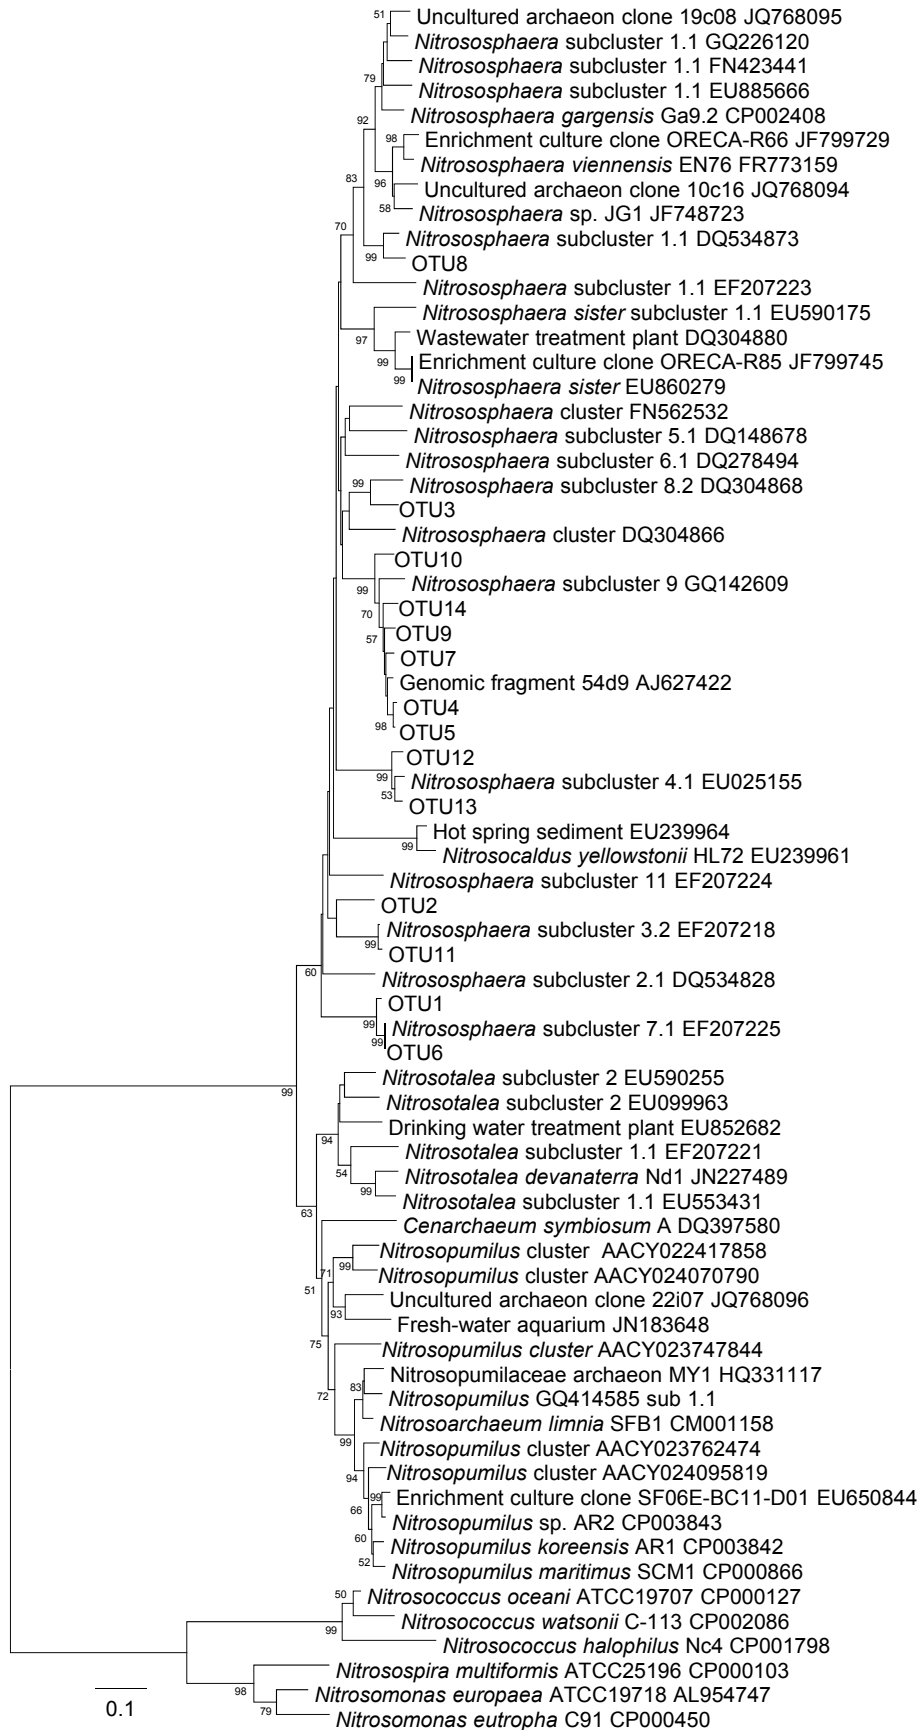

Fig. S3 Phylogenetic tree of AOA *amoA* OTUs. Accession numbers of reference sequences in the NCBI database are indicated. The *amoA* gene sequences of bacterial AOB was used as an outgroup. Branch nodes with >50% supporting bootstrap values (1000 replicates) are shown.

Table S3 *Nitrosospira* cluster composition in the soils.

| Subcluster | OTU No.       | Field No.              |      |      |      |      |      |      |      |
|------------|---------------|------------------------|------|------|------|------|------|------|------|
|            |               | A1                     | A2   | B7   | C1   | D1   | D2   | E2   | E7   |
|            |               | Relative abundance (%) |      |      |      |      |      |      |      |
| 3a         | 1, 3-9, 11-15 | 90.7                   | 93.8 | 89.1 | 82.8 | 75.6 | 71.5 | 64.2 | 92.6 |
| 3b         | 10            | 0.6                    | 2.9  | 3.7  | 8.2  | 0.0  | 0.2  | 0.0  | 0.1  |
| 9          | 2             | 0.4                    | 0.0  | 2.9  | 0.0  | 23.8 | 21.7 | 30.0 | 0.0  |

Table S4 *Nitrosophaera* subcluster composition in the soils.

| Subcluster             | OTU No.       | Field No. |      |      |      |      |      |      |      |
|------------------------|---------------|-----------|------|------|------|------|------|------|------|
|                        |               | A1        | A2   | B7   | C1   | D1   | D2   | B2   | E7   |
| Relative abundance (%) |               |           |      |      |      |      |      |      |      |
| 7.1                    | 1,6           | 28.2      | 24.1 | 65.9 | 0.3  | 79.7 | 71.1 | 84.5 | 0.0  |
| 9                      | 4,5,7,9,10,14 | 4.8       | 54.8 | 6.2  | 38.8 | 0.0  | 15.0 | 0.0  | 49.1 |
| 3.2                    | 2,11          | 48.9      | 0.1  | 3.9  | 21.8 | 17.3 | 1.7  | 0.3  | 0.0  |
| 8.2                    | 3             | 15.9      | 3.6  | 6.3  | 25.9 | 0.1  | 4.0  | 2.6  | 0.0  |
| 4.1                    | 12,13         | 0.0       | 1.7  | 0.7  | 0.9  | 0.0  | 0.1  | 0.0  | 19.6 |
| 1.1                    | 8             | 0.0       | 0.1  | 0.0  | 0.0  | 0.0  | 0.0  | 0.0  | 19.8 |
